# Supplementary material for: Low site diversity but high diversity across sites of depauperate Crustacea and Annelida communities in groundwater of urban wells in Kraków, Poland
Source: Copernicus journal article supplement (doi:10.5194/egusphere-2025-2883), 2025-07-07
Supplement: Supplementary file [file egusphere-2025-2883-RC1-supplement.pdf]

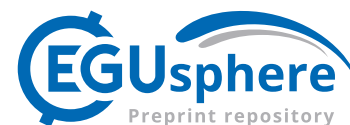

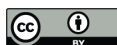

27 **Abstract**

28

29 Crustaceans and annelids are key components of groundwater communities, influenced  
30 by both abiotic conditions and biotic interactions. This study assessed their diversity in urban  
31 groundwaters accessed via 91 dug/drilled wells in Kraków, southern Poland, subject to  
32 chronic anthropogenic disturbance. Invertebrates were recorded in 47 wells, with 19 species-  
33 group taxa identified from 28 wells, including eight annelid and 11 crustacean taxa  
34 (Ostracoda: 3; Copepoda: 6; Bathynellacea: 1; Amphipoda: 1). Six **stygobiontic** taxa were  
35 detected in 10 wells: *Trichodrilus cernosvitovi*, *Trichodrilus* sp., *Typhlocypris* cf. *eremita*,  
36 *Diacyclops languidoides*, *Bathynella natans*, and *Niphargus* cf. *tatrensis*. Due to some  
37 taxonomic uncertainties, open nomenclature was used where necessary. Species accumulation  
38 did not reach saturation, but extrapolation suggested the sampling was **near-complete**. Alpha  
39 diversity was low (1–3 species per well, mean = 1.4), while beta diversity was high  
40 (Whittaker index = 12.3), indicating substantial species turnover, a typical feature of  
41 groundwater ecosystems. No clear seasonal trends were observed, consistent with previous  
42 studies in Kraków. Four main community types were identified. One, dominated by  
43 *Enchytraeus* gr. *buchholzi*, may indicate degraded conditions, another, with *Bathynella natans*  
44 and *Aeolosoma* spp., suggests transitional states; a third, dominated by *Trichodrilus* spp.,  
45 likely reflects relatively undisturbed groundwater; and a fourth, more heterogeneous type  
46 dominated by surface copepods, was ecologically ambiguous. Despite generally low richness  
47 and dominance by surface taxa, the presence of six stygobiontic species suggests that at least  
48 20% of the surveyed wells retain relatively good ecological conditions.

49

50

51 **Keywords:** subterranean waters, municipal wells, stygobionts, expected species richness

52

53

54

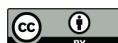

## 55 1. Introduction

56

57 Urban wells, constructed for various purposes, provide convenient access to  
58 groundwater and offer valuable opportunities for studying subterranean aquatic fauna. Urban  
59 expansion is a global phenomenon, with cities continuously increasing in area (Kraków in  
60 southern Poland, for instance, has expanded by 42% since 1950), often encompassing regions  
61 of high conservation value. In urban settings, groundwater is frequently exposed to various  
62 types of pollution, including chemical, organic, and thermal contaminants (Kim, 1992; Burri  
63 et al., 2019; Becher et al., 2022), which pose significant risks to subterranean fauna. These  
64 threats are increasingly recognized, prompting frequent assessments of water chemistry and  
65 microbial communities. Consequently, the monitoring of groundwater quality has become a  
66 standard practice in many European countries under the EU Water Framework Directive  
67 (WFD, 2000) and the Groundwater Directive (GWD, 2006).

68 Despite the ecological significance of urban groundwater ecosystems, the invertebrate  
69 fauna of urban wells has historically been studied in only a limited number of European cities.  
70 Some of the earliest and most extensive research was conducted in Prague, Czech Republic,  
71 by Vejdovský (1882), Sládeček and Řehačková (1952), Řehačková (1953), and Ertl (1957).  
72 Additional historical studies include those by Jaworowski (1893) in wells of Lviv (Ukraine)  
73 and Kraków, Chappuis (1924) in Basel, and Vornatscher (1972) on crustaceans in Vienna.  
74 After a long hiatus, interest in urban groundwater fauna has recently resurged, with studies by  
75 Koch et al. (2021), Becher et al. (2022, 2024), Englisch et al. (2024), and Meyer et al. (2024).  
76 Only very recently have systematic efforts to monitor groundwater fauna in cities been  
77 initiated (Johns, 2024), underscoring the growing importance of this field. Earlier publications  
78 focused primarily on species inventories, whereas recent studies have increasingly addressed  
79 the impacts of urbanization and patterns of biodiversity.

80 The most commonly encountered invertebrate groups in urban wells are annelids and  
81 crustaceans. In Poland, annelids have been relatively well studied in various subterranean  
82 habitats, including rural wells, and additional records have been provided in the course of  
83 other ecological research. These data were comprehensively reviewed by Dumnicka et al.  
84 (2020). A checklist of Polish groundwater crustaceans was compiled by Pociecha et al.  
85 (2021), and subsequently complemented by Karpowicz et al. (2021) and Karpowicz and  
86 Smolska (2024). The distribution of the amphipod genus *Niphargus* in Poland has been  
87 particularly well documented, primarily through the work of Skalski (e.g., 1970, 1981), with a



88 synthesis provided by Dumnicka and Galas (2017) and additional records recently reported  
89 (pers. comm. A. Górny).

90 Despite this progress, the subterranean aquatic fauna of urban areas in Poland remains  
91 insufficiently explored. In Kraków, local geology and contamination patterns have been  
92 shown to influence species presence and distribution (Dumnicka et al., 2025).

93 The aim of this study was to assess the taxonomic diversity of annelid and crustacean  
94 communities inhabiting groundwater from 91 urban wells in Kraków, estimate total species  
95 richness, evaluate seasonal variation, and identify major community types. These insights  
96 may help determine whether groundwater in at least some of these wells still retains a  
97 reasonably good ecological state.

98

## 99 **2. Material and Methods**

100

### 101 **2.1. Study area and sampling sites**

102 Kraków is located at the junction of three tectonic units: the Silesian-Kraków  
103 Monocline, the Miechów Basin, and the Precarpathian Depression, which results in a highly  
104 complex geological and hydrogeological structure of this area (Kleczkowski et al., 2009). The  
105 studied urban wells are distributed across the city, from the historic Old Market Square to the  
106 outer residential districts (Fig. 1). Most wells are situated in Quaternary sediments composed  
107 of gravel and sand, with occasional inclusions of peat and silt. In the city center, these are  
108 overlain by a few-meter-thick layer of anthropogenic deposits. Other wells are located in  
109 Neogene (Miocene) sediments composed of various lithologies, such as marls, shales, and  
110 gypsum (gypsum-salt formations) (Rutkowski, 1989). The Vistula River flows through  
111 Kraków center and is fed by several tributaries (Fig. 1). Holocene fluvial sediments, mainly  
112 sands and gravels, occur within the river valleys.

113 According to the list obtained from the Kraków Water Company, approximately 350  
114 bored/dug, driven or drilled wells were constructed in the area between the early 19th century  
115 and the 1980s. Currently, only about half of these are operational. For the present study, 83  
116 such relatively shallow bored/dug wells were selected. Their depths range from 2.3 to 30.0  
117 meters, with a typical water column height of 2–4 meters. These wells are primarily fed by  
118 percolating water from Quaternary aquifers; however, hydraulic connections with deeper  
119 Jurassic or Cretaceous layers have been identified in some locations (Chowaniec et al., 2007).  
120 Each well is equipped with a piston pump and is fully sealed at the surface (Fig. 2, left).



121 In addition, 11 deep artesian wells are present in the area. These wells reach the  
122 Jurassic aquifer at depths of 80–100 meters and discharge groundwater to the surface without  
123 mechanical pumping due to artesian pressure (Rajchel, 1998). The emerging water is directed  
124 through pipes (Fig. 2, right). Five of these artesian wells were included in the study.

125 Finally, tap water samples were collected from three separate municipal water intakes.  
126 Although well water is not potable, it is occasionally used for purposes such as plant  
127 irrigation.

128

## 129 2.2. Sampling, sample processing and invertebrate identification

130 Sampling was conducted in two consecutive years, 2019 (59 wells) and 2020 (32 wells),  
131 with two sampling events per year: spring (April–June) and autumn (September–October). At  
132 each of the 91 sampling sites (see Supplementary Table 1 and Fig. 1) and during each  
133 sampling event, 100 L of groundwater were filtered using a plankton net with a mesh size of  
134 50 µm. Invertebrates were sorted live under a stereoscopic microscope and subsequently  
135 preserved in 95% ethanol. Crustaceans and annelids were identified to the species level  
136 whenever possible, based on available literature (e.g., Meisch, 2000; Timm, 2009; Błędzki  
137 and Rybak, 2016). All taxa were analyzed in samples from both sampling years, with the  
138 exception of copepods, which were identified to species level only in the samples collected  
139 during the second year.

140 Water **properties** were measured concurrently with biological sampling. Temperature  
141 and specific conductivity (at 25°C) were recorded *in situ* using a portable multimeter  
142 (Elmetron CX-401). Ion concentrations were determined in the laboratory of the Institute of  
143 Geography and Spatial Management, Jagiellonian University, Kraków, Poland, using ion  
144 chromatography following the methods described in Dumnicka et al. (2025).

145

## 146 2.3. Ecological and statistical analyses

147 To assess whether the sampling effort was sufficient to capture the **theoretical** species  
148 richness of the studied area, species **accumulation** curves were generated using all 182 samples  
149 collected from the 91 wells. These curves illustrate how the number of detected species  
150 increases with the number of accumulated samples. Four standard non-parametric richness  
151 estimators based on abundance data (Chao 1, Jackknife 1, Bootstrap, and Michaelis-Menten)  
152 were also calculated to predict the total expected species richness. The mean (and standard  
153 deviation for Chao 1) of both observed and estimated species richness were calculated from  
154 9,999 permutations, with samples added in random order, using PAST v. 4.10 (Hammer et al.,



2001) and the Species-Accumulation Plot routine in PRIMER 7 software (Clarke and Gorley, 2015).

To evaluate biodiversity across the wells, several diversity metrics were computed using PAST v. 4.10 (Hammer et al., 2001) and in PRIMER 7 (Clarke and Gorley, 2015). These included: a) Alpha diversity ( $\alpha$ ) – species richness per site, b) species frequency – number of wells in which each species was present, c) **Gamma** diversity ( $\gamma$ ) – total species richness across all sites, and d) **Beta** diversity ( $\beta$ ) – computed as Whittaker's species turnover index ( $\beta = \gamma / \alpha - 1$ ). For both alpha diversity and species frequency, mean values, ranges, standard deviations, and 95% confidence intervals were estimated using the bias-corrected and accelerated (BCa) bootstrap method with 9,999 replicates. These diversity metrics were calculated separately for three datasets: 1) all species, 2) **stygobiontic** species, and 3) non-**stygobiontic** species. Differences in mean alpha diversity and mean species frequency between **stygobiontic** and non-**stygobiontic** groups were tested using one-way permutational analysis of variance (PERMANOVA) with 9,999 permutations in PRIMER 7 with the PERMANOVA+ add-on (Anderson et al., 2008).

To assess seasonal differences in the composition and structure of crustacean and annelid communities, non-metric multidimensional scaling (nMDS) was performed based on Bray-Curtis similarity matrices derived from species abundance data (with all-zero samples excluded). Seasonal differences were further tested using PERMANOVA (9,999 permutations), implemented in PRIMER 7 with the PERMANOVA+ add-on.

Finally, Principal Coordinates Analysis (PCoA) based on Bray-Curtis similarity of relative abundance (percentage) data was used to visualize differences in community structure and composition of crustaceans and annelids among wells. Pearson correlation vectors (threshold  $> 0.2$ ) were overlaid on the PCoA plot to highlight taxa contributing most strongly to observed patterns. This analysis was also conducted using PRIMER 7 with the PERMANOVA+ add-on.

181

### 182 **3. Results**

183

#### 184 **3.1. Groundwater physical and chemical properties**

A summary of the variation in physical and chemical water properties across the studied wells is provided in Fig. 3, with detailed data available in Dumnicka et al. (2025).

Water temperature in all wells was relatively high, ranging from 9.7 to 16.2°C, while pH values were predominantly circumneutral (6.5–8.2). Electrical conductivity ranged from 314 to



189 3641  $\mu\text{S}/\text{cm}$ , with a mean of 1276  $\mu\text{S}/\text{cm}$ , indicating soft to moderately hard water and generally  
190 low to moderate dissolved ion concentrations. Some wells exhibited elevated concentrations of  
191 sulphates and/or chlorides ( $> 250 \text{ mg/L}$ ), with values varying depending on well location and  
192 local pollution sources (Dumnicka et al., 2025). Nitrogen concentrations, in the form of nitrates  
193 and ammonium, also varied widely. A considerable proportion of wells were nitrate-enriched  
194 ( $> 50 \text{ mg NO}_3^-/\text{L}$ ) or ammonium-enriched ( $> 0.5 \text{ mg NH}_4^+/\text{L}$ ). Additionally, relatively high  
195 concentration of phosphates ( $> 0.1 \text{ mg PO}_4^{3-}/\text{L}$ ) and of fluorides ( $> 1.5 \text{ mg F}^-/\text{L}$ ) were recorded  
196 in some wells (see Dumnicka et al., 2025; Fig. 3 here).

197

### 198 3.2. Taxonomic richness and diversity

199 Crustaceans or annelids were recorded in 47 out of 91 wells (52%), but these could be  
200 identified to species level in 28 wells (31%), resulting in 19 species-group taxa (gamma  
201 diversity) belonging in Annelida and in four crustacean groups: Ostracoda, Copepoda,  
202 Bathynellacea, and Amphipoda, and representing both stygobiontic and non-stygobiontic  
203 ecological groups. Interestingly, annelids and crustaceans occurred largely allopatrically  
204 (Table 1). Other invertebrate taxa, including Microturbellaria, Nematoda, Rotifera,  
205 Collembola, and Diptera larvae, were also found but were excluded from further analysis as  
206 they were not identified to species level (see Dumnicka et al., 2025).

207 As expected given the rarity of many species, the species accumulation curve of the  
208 observed number of annelid and crustacean species based on all 182 samples from 91 wells  
209 did not reach an asymptote (Fig. 4), indicating incomplete sampling. Extrapolated species  
210 richness estimates ranged from 23.2 (Bootstrap) to 31.5 (Chao 1), suggesting that between  
211 60.3% and 81.9% of the estimated total species pool of the studied area was captured (Table  
212 2).

213 Annelids were found in 17 wells (Table 1), and conservatively assigned to at least  
214 eight species. Many specimens were immature and were therefore left in open nomenclature.  
215 The semi-aquatic family Enchytraeidae was considered as represented by two species: one  
216 identified as *Enchytraeus* gr. *buchholzi* and one taxon of the genus *Achaeta*. Other recorded  
217 annelids included surface-dwelling *Rhynchelmis* (Lumbriculidae), treated as a single species  
218 due to immature material, two *Aeolosoma* species-group taxa, one identified as *A. hyalinum*,  
219 and stygobiontic *Trichodrilus*, conservatively treated as two species-group taxa, one of which  
220 (*T. cernovitovi*) was confirmed by a single mature individual.

221 Ostracods were recorded only in three wells and they were represented by at least three  
222 species of the family Candonidae, one stygobiontic *Typhlocypris* cf. *eremita*, and two other



223 surface dwelling species left in open nomenclature since the collected juvenile specimens  
224 were not identified down to the species level (representatives of the genus *Pseudocandona*)  
225 and neither at the species nor at the genus level (representatives of the family Candonidae)  
226 (Table 1).

227 Copepods were the most frequently recorded group, present in 37 wells. However,  
228 only specimens from the second sampling year were identified to species level and considered  
229 in further analyses. Six species were identified, most typical of small, astatic surface waters.  
230 Only one **stygobiontic** species, *Diacyclops languidoides*, was recorded in a single well (Table  
231 1).

232 Two additional **stygobiontic** crustaceans were recorded: *Bathynella natans*  
233 (Bathynellacea) and *Niphargus* cf. *tatrensis* (Amphipoda) (Table 1).

234 Among the 28 wells where crustaceans and/or annelids were identified to species level,  
235 the most frequent species were *Enchytraeus* gr. *buchholzi* (found in 10 wells, 36%) and  
236 *Trichodrilus* spp. (4 wells, 14%). Notably, 10 species (53%) were found in only one well  
237 (Table 1). The mean species occurrence frequency across the full dataset was  $2.1 \pm 2.0$  wells  
238 (mean  $\pm$  standard deviation SD), with no significant difference between stygobionts ( $2.0 \pm$   
239  $1.3$ ) and non-stygobionts ( $2.2 \pm 2.5$ ) (PERMANOVA:  $F = 0.020$ ,  $P = 0.953$ ; Table 3).

240 Alpha diversity averaged  $1.4 \pm 0.7$  species per well, ranging from 1 to 3. **Stygobiontic**  
241 species exhibited significantly lower mean alpha diversity ( $0.4 \pm 0.7$ ) compared to non-  
242 stygobionts ( $1.0 \pm 0.7$ ) (PERMANOVA:  $F = 4.874$ ,  $P = 0.026$ ). Despite generally low alpha  
243 diversity, beta diversity (Whittaker index) was high for the entire dataset (12.3) and for both  
244 stygobionts (13.0) and non-stygobionts (12.0), indicating high species turnover among wells  
245 (Table 3). This is consistent with the PCoA results based on Bray-Curtis similarity for each  
246 pair of wells (see below).

247

### 248 3.3. Seasonal variation in community structure and composition

249 Non-metric Multidimensional Scaling (nMDS) ordination revealed overlap between  
250 samples collected in spring and autumn (Fig. 5), suggesting no significant seasonal  
251 differences in the structure and composition of crustacean and annelid communities. This was  
252 supported by PERMANOVA ( $F = 1.30$ ,  $P = 0.171$ ).

253

### 254 3.4. Major community types

255 Principal Coordinate Analysis (PCoA) revealed four distinct community types, with  
256 the first two axes explaining 35.7% of the total variance (Fig. 6). Eight species/taxa exhibited



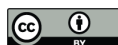

the strongest correlations with the first two PCoA axes and contributed most to the observed pattern (Table 4). The first PCoA axis separated seven wells dominated by nearly monospecific community of *Enchytraeus* gr. *buchholzi* (with minor contribution from Candonidae ostracods), positioned on the right side of the plot, from three additional community types on the left. The lower-left quadrant grouped four wells dominated by stygobiontic *Trichodrilus* spp. and *Niphargus* cf. *tatrensis* (with minor enchytraeid presence). The upper-left quadrant contained five wells with the community type characterized by *Bathynella natans* and *Aeolosoma* spp. Between these two community types were 12 wells representing a fourth, less clearly structured community type, distinguished primarily by the surface-dwelling copepods *Acanthocyclops venustus* and *Paracyclops imminutus*, along with various copepods, ostracods, amphipods, and annelids, including stygobionts.

#### 4. Discussion

Although invertebrates have been recorded in 74 of the 91 wells examined in this study, representing 81.3% of the total (Dumnicka et al., 2025), which is comparable to the 81.6% colonization rate observed in 201 wells in Munich (Becher et al., 2024), crustaceans and/or annelids were detected in only about half of these wells (52%). Given the absence of significant differences in the main environmental variables between wells with and without invertebrates (Dumnicka et al., 2025), the absence of crustaceans and annelids in some wells is likely attributable to other natural factors or methodological constraints. These may include the limited dispersal capacity of these taxa in groundwater, the isolation of some aquifers, low population densities leading to non-detection during sampling, or unexamined environmental factors known to influence groundwater fauna (e.g., Marmonier et al., 2023; Hotèkpo et al., 2025), particularly in urban settings. Potential anthropogenic stressors include chemical pollution, oxygen depletion, and thermal disturbances (Becher et al., 2022). Notably, groundwater temperatures in Kraków wells were approximately 3°C higher than those in rural wells located 30–40 km from the city (Dumnicka et al., 2017, 2025).

The availability of organic matter and dissolved oxygen, largely dependent on surface-subsurface water exchange, is essential for sustaining groundwater faunal communities. In urban environments, such exchange is often impeded by extensive built-up areas, impervious surfaces, and drainage infrastructure (Becher et al., 2022). Other water chemistry parameters of Kraków urban wells, such as mineralization and nutrient levels, shaped in part by the complex geology of the region (Kleczkowski et al., 2009; Gradziński and Gradziński, 2015),

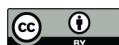

291 as well as local contamination, may also affect the faunal presence (Chowaniec et al., 2007;  
292 Dumnicka et al., 2025). Similar variability in groundwater chemistry has been reported from  
293 other European cities (Koch et al., 2021; Becher et al., 2022; Englisch et al., 2022; Meyer et  
294 al., 2024). Unfavourable chemical conditions, such as low oxygen or high salinity, may  
295 explain the absence of invertebrates in certain wells. Furthermore, the complete sealing of  
296 some wells and their location in “urban desert” areas likely inhibit colonization by surface-  
297 dwelling species, which can otherwise enhance local groundwater biodiversity. Given this  
298 isolation, colonization pathways for surface annelids and crustaceans remain difficult to trace  
299 – entry into groundwater likely occurs by chance, and populations may or may not persist.  
300 Surface water proximity and rainwater infiltration probably facilitate invertebrate access. In  
301 the wells studied in Kraków, a substantial proportion of the annelid and crustacean  
302 communities consisted of surface-water taxa, a pattern also observed in other Polish wells  
303 (Dumnicka et al., 2020; Karpowicz et al., 2021; Pocięcha et al., 2021) and those in other  
304 countries (e.g., Vejdovský, 1882; Řehačková, 1953; Dalmás, 1973; Bozkurt, 2023).

305 The frequencies of annelids (19%) and crustaceans (46%) observed in this study fall  
306 within the broad range reported for other large European and North African cities, where  
307 annelids and crustaceans have been found in 7–58% and 3–75% of wells, respectively  
308 (Vejdovský, 1882; Jaworowski, 1893; Řehačková, 1953; Vornatscher, 1972; Koch et al.,  
309 2021; El Moustaine et al., 2022; Dumnicka et al., 2025).

310 We found no clear pattern of seasonal variation in the composition of crustacean and  
311 annelid communities. This aligns with previous findings in the urban wells in Kraków  
312 showing no significant differences in total or group-specific abundances, although taxa  
313 richness and the Shannon–Wiener diversity index were significantly higher in autumn than in  
314 spring (Dumnicka et al., 2025). Seasonal dynamics in invertebrate communities in urban  
315 wells remain unexplored. Bozkurt (2023), for example, found only minor seasonal differences  
316 in copepods, cladocerans and rotifers in 29 wells in Kilis, southern Turkey, although these  
317 were not statistically tested.

318 The gamma diversity of crustaceans and annelids in Kraków wells was relatively high,  
319 with 19 species recorded, including six stygobionts, although some uncertainty remains to  
320 whether all juvenile *Trichodrilus* specimens represent true stygobiont species. However, the  
321 species accumulation curve did not reach saturation. The low mean species frequency (2.1  
322 wells), with no significant differences between stygobionts and non-stygobionts, suggests that  
323 additional sampling would likely yield further species. Extrapolation metrics indicate,



324 however, that 4 to 13 additional species might be detected, implying that the current sampling  
325 effort approached completeness.

326 Alpha diversity was relatively low, ranging from one to three species per well, with an  
327 average of  $1.4 \pm 0.7$ . Notably, the alpha diversity was significantly lower for the **stygobiontic**  
328 species (on average  $< 1$  species) than for surface-dwelling species (on average 1 species).  
329 Similar alpha diversity (mean 1.3, range 1–2) for crustaceans and annelids has been  
330 historically reported in urban wells in Lviv, Ukraine as well as in Kraków (Jaworowski,  
331 1893), while more diverse communities of these invertebrate groups have also been reported  
332 in wells in other cities. For instance, El Moustaine et al. (2022) documented alpha diversity  
333 ranging from 1 to 6 species (mean 2.8) in eight well in Meknes, Morocco, although some taxa  
334 were identified only to genus or family level. Comparative analyses remain limited due to a  
335 paucity of detailed taxonomic studies in urban well fauna in Europe and the tendency of some  
336 to report only higher taxonomic groups (e.g., Cyclopoida, Amphipoda, Oligochaeta) (Koch et  
337 al., 2021).

338 Copepods were the most frequently encountered in Kraków wells, with six species  
339 identified, **including only one stygobiont: *Diacyclops languidoides***, previously recorded in  
340 Poland from five caves, a well and an interstitial habitat (Pociecha et al., 2021). Copepods are  
341 key components of groundwater fauna, often comprising true stygobionts and taxa adapted to  
342 subsurface habitats (Galassi et al., 2009). Previous surveys of Polish groundwater habitats  
343 have reported 51 copepod species, with only four true stygobionts (Karpowicz et al., 2021;  
344 Pociecha et al., 2021; Karpowicz and Smolska, 2024). In wells 37 species have been recorded  
345 (including three stygobionts), primarily Cyclopoida (30 species) plus one Calanoida and six  
346 Harpacticoida. Most non-**stygobiontic** copepods in our study likely originated from surface  
347 waters in the Kraków area, as suggested by the presence of *Acanthocyclops venustus* and *A.*  
348 *vernalis*, known from local surface habitats (see Ślusarczyk, 2003; Kur, 2012; Pociecha and  
349 Bielańska-Grajner, 2015; Żurek, 2000 and Żurek et al., 2019 for surface water copepods in  
350 Kraków).

351 Despite the relatively high total number of ostracod species recorded in Polish  
352 groundwater environments (38 species, including nine stygobionts) and specifically from  
353 wells (22 species, including eight stygobionts), only three species were found in present  
354 study: one stygobiont (*Typhlocypris* cf. *eremita*) and two surface dwelling juvenile candonids.  
355 *Typhlocypris eremita* is a most common representative of the stygobiontic genus  
356 *Typhlocypris*, with representatives found mainly in the interstitial habitats of alluvial aquifers,  
357 in the hyporheic zone along rivers and in cavernicolous habitats of central and south-eastern



Europe (Namiotko and Danielopol, 2004; Namiotko et al., 2004, 2014). In Poland *T. eremita* is a most common stygobiontic ostracod (Sywula, 1981; Pocięcha et al., 2021), occasionally collected in surface waters connected to groundwater (Namiotko, 1990; Namiotko and Sywula, 1993).

Two additional crustacean stygobionts were recorded: the bathynellacean *Bathynella natans* and the amphipod *Niphargus* cf. *tatrensis*. The former has been found in one well and five interstitial sites in southern Poland (Sywula, 1989; Pocięcha et al., 2021), while the latter is the most widespread Polish stygobiont amphipod, commonly found in caves, wells, and interstitial habitats (Dumnicka and Galas, 2017; Pocięcha et al., 2021).

Subterranean waters in Poland are known to host 111 annelid species (Dumnicka et al., 2020), with Enchytraeidae being particularly diverse, including soil-dwelling or semi-aquatic species. In Kraków, surface water oligochaetes have been rarely studied (Szarski, 1947, Dumnicka, 2002), with *Nais elinguis* being the most common taxon, mainly in lotic habitats. Previous surveys found Enchytraeidae to be relatively rare in Polish wells, with more common Tubificidae and Naididae including several stygophiles (Dumnicka et al., 2020). Similarly, our study found relatively few annelid species. Beside semi-aquatic taxa, also occasional individuals of surface-dwelling genera *Rhynchelmis* and *Aeolosoma*, were unexpectedly observed in the wells in the Kraków centre. Stygobiontic *Trichodrilus* spp. were found in four wells, potentially indicating higher water quality.

Despite low alpha diversity, beta diversity among wells was high – a pattern characteristic of groundwater ecosystems (Hahn and Fuchs, 2009; Malard et al., 2009; Stoch and Galassi, 2010; Zgamałster et al., 2014; Hose et al., 2022). Crustaceans and annelids generally occurred allopatrically, forming four main community types. One type, dominated by *Enchytraeus* gr. *buchholzi* and observed in seven wells may reflect degraded conditions according to the German groundwater ecosystem status index (GESI) (Koch et al., 2021). Another type, dominated by *Bathynella natans* with *Aeolosoma* spp. which was observed in five studied wells may indicate transitional ecological conditions, while the third type dominated in four wells by *Trichodrilus* spp. suggest relatively unaffected conditions. The forth, more heterogeneous community, distinguished primarily by the surface copepods *Acanthocyclops venustus* and *Paracyclops inminutus* is difficult to interpret ecologically. In conclusion, although species richness and abundances of annelids and crustaceans were relatively low and dominated by surface water taxa, the occurrence of six stygobiontic species in 10 of 47 wells with crustaceans and/or annelids (or of 28 wells with species-level identifications) suggests that 1/5 to 1/3 of wells in Kraków may offer relatively good



ecological conditions. Even in urban environments, groundwater fauna play a vital ecological role and may serve as bioindicators, reflecting environmental changes over multiple time scales. Accordingly, the development of a biomonitoring framework for subterranean waters, as proposed by Johns (2024), is warranted.

## Conclusion

This study reveals that despite the relatively low alpha diversity of annelids and crustaceans in urban wells of Kraków, their beta and gamma diversity indicate a heterogeneous and partially natural subterranean ecosystem. The occurrence of stygobiontic species in a notable proportion of wells suggests that some groundwater habitats in the city retain ecological integrity. These findings highlight the importance of including urban groundwater fauna in biodiversity assessments and support the need for long-term biomonitoring systems to track environmental changes and protect subterranean ecosystems in urban areas.

## Author Contributions

E. D.: conceptualization, investigation, methodology (collection, analysis, and interpretation of data), formal analysis, writing – original draft, writing – review and editing, project administration; J. G.: investigation, methodology (collection, analysis of data), writing – original draft, writing – review and editing, project administration; T. N.: conceptualization, investigation, methodology (analysis and interpretation of data), formal analysis, writing – original draft, writing – review and editing; A. P.: conceptualization, investigation, methodology (analysis, and interpretation of data), formal analysis, writing – original draft, writing – review and editing.

## Acknowledgments

We are very much indebted to Mirosław Żelazny from the Institute of Geography and Spatial Management, Jagiellonian University, Kraków for allowing the use of the water chemical analyses.

We also would like to thank the Management of the Kraków Water Company for sharing the list of wells existing in city area.

## Funding



427 This research was funded by subvention of Institute of Nature Conservation, Polish Academy of  
428 Sciences (E.D., J.G., A.P.) and partly by the University of Gdansk attributed to T.N.

429

#### 430 **Conflicts of Interest**

431 The authors declare no conflicts of interest.

432

#### 433 **Data Availability Statement**

434 The authors confirm that data supporting the findings of this study are available in the article.

435 Readers interested in other materials can request this information from the corresponding author.

436

#### 437 **Supporting Information**

438 Additional supporting information can be found online in the Supporting Information section.

439

#### 440 **References**

441

442 Anderson, M. J., Gorley, R. N., and Clarke, K. R.: PERMANOVA+ for PRIMER: Guide to  
443 Software and Statistical Methods. PRIMER-E, Plymouth, UK, 2008.

444 Becher, J., Englisch, C., Griebler, C., and Bayer P.: Groundwater fauna downtown – drivers,  
445 impacts and implications for subsurface ecosystems in urban areas, J. Contam. Hydrol.,  
446 248, 1–16, <https://doi.org/10.1016/j.conhyd.2022.104021>, 2022.

447 Becher, J., Griebler, C., Fuchs, A., Gaviria, S., Pfingstl, T., Eisendle, U., Duda, M., and Bayer  
448 P. B.: Groundwater fauna below the city of Munich and relationships to urbanization  
449 effects, 26<sup>th</sup> Internat. Conf. Subter. Biol., – 6<sup>th</sup> Internat. Symp. on Anchialine  
450 Ecosystems, Cagliari 9–14 Sept., Book of Abstracts, 77, 2024.

451 Błędzki, L.A., and Rybak J.I.: Freshwater Crustacean Zooplankton of Europe: Cladocera &  
452 Copepoda (Calanoida, Cyclopoida). Key to Species Identification, with Notes on  
453 Ecology, Distribution, Methods and Introduction to Data Analysis, Springer:  
454 Berlin/Heidelberg, Germany, 2016.

455 Bozkurt, A.: Investigation of groundwater zooplankton fauna from water wells in Kilis  
456 Province from Türkiye, Nat. Engin. Sci., 8, 86–105, 2023.

457 Burri, N.M., Weatherl, R., Moeck, Ch., and Schirmer M.: A review of threats to groundwater  
458 quality in the Anthropocene, Sci.Total Environ., 684, 136–154,  
459 <https://doi.org/10.1016/j.scitotenv.2019.05.236>, 2019.



- 460 Chappuis, P. A.: Die Fauna der unterirdischen Gewässer der Umgebung von Basel, Arch.  
461 Hydrobiol., 14, 1–88, 1924.
- 462 Chowaniec, J., Freiwald, P., Patorski, R., and Witek, K.: Kraków. In: Wody podziemne miast  
463 wojewódzkich Polski, Ed. Nowicki, Z. 72–88, Warszawa, Polska: Informator  
464 Państwowej Służby Hydrogeologicznej, PGI, 2007. [in Polish]
- 465 Clarke, K. R., and Gorley R. N.: PRIMER v7: User Manual/Tutorial. PRIMER-E, Plymouth,  
466 UK, 2015.
- 467 Dalmas, A.: Zoocenoses de puits artificiels en provence. Ann. Spéléol., 28, 517–522, 1973.
- 468 Dumnicka, E.: Upper Vistula River: Response of aquatic communities to pollution and  
469 impoundment. X. Oligochaete taxocens, Pol. J. Ecol., 50, 237–247, 2002.
- 470 Dumnicka, E., and Galas, J.: An overview of stygobiontic invertebrates of Poland based on  
471 published data, Subterranean Biology, 23, 1–18, DOI: 10.3897/subtbiol.23.11877, 2017.
- 472 Dumnicka, E., Galas, J., and Krodkiewska, M.: Patterns of benthic fauna distribution in wells:  
473 the role of anthropogenic impact and geology, Vadose Zone J., 16, 1–9,  
474 DOI:10.2136/vzj2016.07.0057oi:10.2136, 2017.
- 475 Dumnicka, E., Galas, J., Krodkiewska, M., and Pocięcha, A.: The diversity of annelids in  
476 subterranean waters: a case study from Poland, Knowl. Manag. Aquat. Ecosyst., 421,  
477 16, doi.org/10.1051/kmae/2020007, 2020.
- 478 Dumnicka, E., Galas, J., Krodkiewska, M., Pocięcha, A., Żelazny, M., Biernacka, A., and  
479 Jelonkiewicz, Ł.: Ecohydrological conditions in municipal wells and patterns of  
480 invertebrate fauna distribution (Kraków, Poland), Ecohydrology, 18,  
481 doi.org/10.1002/eco.2757, 2025.
- 482 El Moustaine, R., Chahlaoui, A., Khaffou, M., Rour, E., and Boulal, M.: Groundwater quality  
483 and aquatic fauna of some wells and springs from Meknes area (Morocco), Geology,  
484 Ecology, and Landscapes, DOI: 10.1080/24749508.2022.2134636, 2022.
- 485 Englisch, C., Kaminsky, E., Steiner, C., Stumpp, C., Götzl, G., and Griebler, C.: Heat Below  
486 the City – Is Temperature a Key Driver in Urban Groundwater Ecosystems? In:  
487 ARPHA Conference Abstracts, 5, e89677, Sofia, Bulgaria, Pensoft Publishers, [https://](https://doi.org/10.3897/aca.5.e89677)  
488 doi.org/ 10.3897/ aca.5. e89677, 2022.
- 489 Englisch, C., Kaminsky, E., Steiner, C., Buga-Nyeki, E., Stumpp, C., and Griebler C.: Life  
490 below the City of Vienna - Drivers of groundwater fauna distribution in an urban  
491 ecosystem, 26<sup>th</sup> Internat. Conf. Subter.– Biol., 6<sup>th</sup> Internat. Symp. on Anchialine  
492 Ecosystems, Cagliari 9–14 Sept., Book of Abstracts, 74, 2024.





- 493 Ertl, M.: Jahreszeitliche Veränderungen der Brunnenorganismen im Verhältnis zur  
494 oberflächlichen Verunreinigung der Brunnen, *Biologica: Universitas Carolina*, 3, 109–  
495 131, 1957. [in Czech with German Summary].
- 496 Galassi, D.M.P., Huys, R., and Reid, J.W.: Diversity, ecology and evolution of groundwater  
497 copepods, *Freshw. Biol.*, 54, 691–708, doi:10.1111/j.1365-2427.2009.02185.x, 2009.
- 498 Gradziński, M., and Gradziński, R.: Budowa Geologiczna. [Geology]. In: *Natural*  
499 *Environment of Krakow. Resources-Protection-Management*. Eds: Baścik, M., and  
500 Degórska, B. Kraków, Poland, Institute of Geography and Spatial Management  
501 Jagiellonian University, 23–32, 2015. [in Polish with English Summary].
- 502 GWD 2006. Directive 2006/118/EC of the European Parliament and of the Council of 12  
503 December 2006 on the Protection of groundwater against pollution and deterioration,  
504 <http://data.europa.eu/eli/dir/2006/118/oj> 2006.
- 505 Hahn, H. J., and Fuchs, A.: Distribution patterns of groundwater communities across aquifer  
506 types in South-Western Germany, *Freshw. Biol.*, 54, 848–860, 2009.
- 507 Hammer, O., Harper, D. A. T., and Ryan, P. D.: Past: paleontological statistics software  
508 package for education and data analysis, *Palaeontologia Electronica*, 4, 1–9, 2001.
- 509 Hose, G. C., Chariton, A. A., Daam, M. A., Di Lorenzo, T., Galassi, D. M. P., Halse, S. A.,  
510 Reboleira, A. S. P. S., Robertson, A. L., Schmidt, S. I., and Korbel, K. L.: Invertebrate  
511 traits, diversity and the vulnerability of groundwater ecosystems, *Functional Ecology*,  
512 36, 2200–2214, 2022.
- 513 Hotékpó, S. J., Namiotko, T., Lagnika, M., Ibikounle, M., Martin, P., Schon, I., and Martens,  
514 K.: Stygobitic Candonidae (Crustacea, Ostracoda) are potential environmental  
515 indicators of groundwater quality in tropical West Africa, *Freshw. Biol.*, 0:e70043,  
516 <https://doi.org/10.1111/fwb.70043>, 2025.
- 517 Jaworowski, A.: Fauna studzienna miast Krakowa i Lwowa [Fauna of Wells in Kraków and  
518 Lwów Cities], *Spraw. Kom. Fizyograf., AU w Krakowie* 28, 29–48, 1893. [in Polish].
- 519 Johns, T.: Developing the first national monitoring network for groundwater ecology in  
520 England, 26<sup>th</sup> Internat. Conf. Subter. Biol., - 6<sup>th</sup> Internat. Symp. on Anchialine  
521 Ecosystems, Cagliari 9-14 Sept., Book of Abstracts, 6, 2024.
- 522 Karpowicz, M., Smolska, S., Świsłocka, M., and Moroz, J.: First insight into groundwater  
523 copepods of the Polish lowland, *Water*, 13, 2086, 2021.
- 524 Karpowicz, M., and Smolska, S.: Ephemeral Puddles - Potential Sites for Feeding and  
525 Reproduction of Hyporheic Copepoda, *Water*, 16, 1068, 2024.





- 526 Kleczkowski, A.S., Czop, M., Motyka, J., and Rajchel L.Z.: Influence of the geogenic and  
527 anthropogenic factors on the groundwater chemistry in Krakow (south Poland),  
528 Geologia, 35, 117–129, 2009.
- 529 Kim, H. H.: Urban Heat Island, Internat. J. Remote Sensing, 13, 2319–2336, [https:// doi. org/](https://doi.org/10.1080/0143169208904271)  
530 [10. 1080/ 01431 16920 8904271](https://doi.org/10.1080/0143169208904271), 1992.
- 531 Koch, F., Menberg, K., Schweikert, S., Spengle, C., Hahn, H. J., and Blum P.: Groundwater  
532 Fauna in an Urban Area: Natural Or Affected?, Hydrol. Earth Syst. Sci., 25, 3053–3070,  
533 [https://doi. org/ 10. 5194/ hess-25](https://doi.org/10.5194/hess-25) , 2021.
- 534 Kur, J.: Zmienność populacyjna widłonogów Copepoda w wodach podziemnych Południowej  
535 Polski [Population variability of copepods in subterranean waters of Southern Poland],  
536 Praca doktorska, IOP, 127 pp., 2012. [in Polish].
- 537 Malard, F., Boutin, C., Camacho, A. I., Ferreira, D., Michel, G., Sket, B., and Stoch, F.:  
538 Diversity patterns of stygobiotic crustaceans across multiple spatial scales in Europe,  
539 Freshw. Biol., 54, 756–776, 2009.
- 540 Marmonier, P., Galassi, D. M. P., Korb, K., Close, M., Datry, T., and Karwautz, C.:  
541 Groundwater biodiversity and constraints to biological distribution. Chapter 5. In:  
542 Groundwater Ecology and Evolution, Eds: Malard, F., Griebler, C., and Rétaux, S.,  
543 Academic Press, 113–140, <https://doi.org/10.1016/B978-0-12-819119-4.00003-2> 2023.
- 544 Meisch, C.: Freshwater Ostracoda of Western and Central Europe, Spektrum Akademischer  
545 Verlag, Heidelberg Berlin, 522 pp., 2000.
- 546 Meyer, L., Becher, J., Griebler, C., Herrmann, M., Küsel, M., and Bayer, P.: Biodiversity  
547 patterns in the urban groundwater of Halle (Saale), Germany, 24<sup>th</sup> Internat. Conf.  
548 Subter. Biol., - 6<sup>th</sup> Internat. Symp. on Anchialine Ecosystems, Cagliari 9–14 Sept., Book  
549 of Abstracts, 39, 2024.
- 550 Namiotko, T.: Freshwater Ostracoda (Crustacea) of Żuławy Wiślane (Vistula Fen Country,  
551 Northern Poland), Acta Zool. Cracov., 33, 459–484, 1990.
- 552 Namiotko, T., and Sywula, T.: Crustacean assemblages from the irrigation ditches near  
553 Szymankowo (Vistula Delta), Zesz. Nauk. UG, Biologia, 10, 159–162, 1993. [in Polish  
554 with English abstract].
- 555 Namiotko, T., and Danielopol D. L.: Review of the *eremita* species-group of the genus  
556 *Pseudocandona* Kaufmann (Ostracoda, Crustacea), with the description of a new  
557 species, Revista Española de Micropaleontología, 36, 117–134, 2004.



- 558 Namiotko, T., Danielopol, D. L., and Rađa, T.: *Pseudocandona sywulai* sp. nov., a new  
559 stygobitic ostracode (Ostracoda, Candonidae) from Croatia, *Crustaceana*, 77, 311–331,  
560 2004.
- 561 Namiotko, T., Danielopol, D. L., Meisch, C., Gross, M., and Mori, N.: Redefinition of the  
562 genus *Typhlocypris* Vejdovský, 1882 (Ostracoda, Candonidae), *Crustaceana*, 87, 952–  
563 984, 2014.
- 564 Pociecha, A., and Bielańska-Grajner, I.: Large-scale assessment of planktonic organisms  
565 biodiversity in artificial water reservoirs in Poland, Institute of Nature Conservation  
566 Polish Academy of Sciences, pp. 272, 2015.
- 567 Pociecha, A., Karpowicz, M., Namiotko, T., Dumnicka, E., and Galas, J.: Diversity of  
568 groundwater crustaceans in wells in various geologic formations of southern Poland,  
569 *Water*, 13, 2193, doi.org/10.2290/w13162193, 2021.
- 570 Rajchel, L.: Wody mineralne i akrotopegi Krakowa [Mineral waters and akrotopegi in  
571 Kraków], *Przegląd Geologiczny*, 46, 1139–1145, 1998. [in Polish].
- 572 Řehačková, V.: Well-Water Organisms of Prague, *Rozpr. Českoslov. Akad. Věd*, 63, 1–35,  
573 1953. [in Czech with English Summary].
- 574 Rutkowski, J.: Szczegółowa Mapa Geologiczna Polski 1:50 000, arkusz Kraków (973),  
575 [Detailed Geological Map of Poland, 1:50 000, Sheet Kraków], Warszawa, Poland,  
576 Państwowy Instytut Geologiczny, 1989. [in Polish].
- 577 Skalski, A.W.: The hypogeous gammarids in Poland (Crustacea, Amphipoda, Gammaridae),  
578 *Acta Hydrobiol.*, 12, 431–437, 1970.
- 579 Skalski, A.W.: Underground Amphipoda in Poland, *V Rocznik Muzeum Okręgowego w*  
580 *Częstochowie, Przyroda* 2, 61–83, 1981. [in Polish with English summary].
- 581 Sladěček, V., and Řehačková, V.: Les Cyclopides des puits de Prague, *Časopis Narod. Mus.*,  
582 *Oddíl přírodovědný*, 120, 118–125, 1952. [In Czech with French Summary].
- 583 Stoch, F., Galassi, D. M. P.: Stygobiotic crustacean species richness: A question of numbers,  
584 a matter of scale, *Hydrobiologia*, 653, 217–234, 2010.
- 585 Sywula, T.: Ostracoda of underground water in Poland, *V Rocznik Muzeum Okręgowego w*  
586 *Częstochowie, Przyroda* 2, 89–96, 1981. [in Polish with English summary].
- 587 Sywula, T.: *Bathynella natans* Vejdovský, 1882 and *Proasellus slavus* (Remy, 1948),  
588 subterranean crustaceans new for Poland, *Przeg. Zool.*, 33, 77–82, 1989. [in Polish with  
589 English summary].
- 590 Szarski, H.: Oligochaeta limicola found in the neighbourhood of Kraków in the year 1942,  
591 *Kosmos*, ser. A, 65, 150–158, 1947. [in Polish with English summary].



- 592 Ślusarczyk, A.: Limnological study of a lake formed in limestone quarry (Kraków, Poland). I.  
593 Zooplankton community, Pol. J. Environ. Stud., 12, 489–493, 2003.
- 594 Timm, T.: A guide to the freshwater Oligochaeta and Polychaeta of Northern and Central  
595 Europe, Lauterbornia, 66, 1–235, 2009.
- 596 Vejvodský, F.: Thierische Organismen der Brunnenwässer von Prag, Selbstverlag, Prag, pp.  
597 70 mit 8 Tafeln, 1882.
- 598 Vornatscher, J.: Die Tierwelt des Grundwassers – Leben im Dunkeln, In: Die  
599 Naturgeschichte Wiens, Band 2, Naturnahe Landschaften, Pflanzen- Und Tierwelt, Eds:  
600 Starmühler, F., and Ehendorfer, F., 659–674, Jugend und Volk, Wien/München, 1972.
- 601 WFD 2000. Directive 2000/60/EC of the European Parliament and of the Council of 23  
602 October 2000 establishing a framework for Community action in the field of water  
603 policy, <http://data.europa.eu/eli/dir/2000/60/oj> 2000.
- 604 Zagmajster, M., Eme, D., Fišer, C., Galassi, D., Marmonier, P., Stoch, F., Cornu, J. F., and  
605 Malard, F.: Geographic variation in range size and beta diversity of groundwater  
606 crustaceans: insights from habitats with low thermal seasonality, Global Ecol.  
607 Biogeogr., 23, 1135–1145, DOI: 10.1111/geb.12200, 2014.
- 608 Żurek, R.: Diversity of flora and fauna in running waters of the Province of Cracow (southern  
609 Poland) in relation to water quality, 4. Zooseston, Acta Hydrobiol., 42, 331–345, 2000.
- 610 Żurek, R., Baś, G., Dumnicka, E., Gołąb, M.J., Profus, P., Szarek-Gwiazda, E., Walusiak, E.,  
611 Ciężak, K.: Płaszów pond in Kraków – biocenoses, Chrońmy Przyr. Ojcz., 75, 345–362,  
612 2019. [in Polish with English summary].
- 613  
614  
615

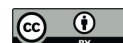

616 **Table 1.** Occurrences of annelids and crustaceans in the studied urban wells in Kraków,  
617 Poland. Stygobiontic species are shown in bold. Asterisks (\*) indicate identifications based on  
618 samples collected only in 2020. Addresses of the numbered wells are provided in  
619 Supplementary Table S1. Complete data on water properties and the occurrences of other  
620 invertebrate groups are available in Dumnicka et al. (2025).  
621

| Taxon                                                           | Number of individuals | Wells                                                                                                  |
|-----------------------------------------------------------------|-----------------------|--------------------------------------------------------------------------------------------------------|
| <b>Annelida</b>                                                 |                       |                                                                                                        |
| <i>Aeolosoma hyalinum</i> Bunke, 1967                           | 2                     | 3                                                                                                      |
| <i>Aeolosoma</i> spp.                                           | 4                     | 21, 73, 82                                                                                             |
| <i>Achaeta</i> sp. juv.                                         | 1                     | 35                                                                                                     |
| <i>Enchytraeus</i> gr. <i>buchholzi</i> Vejdovský, 1879         | 3                     | 61, 68                                                                                                 |
| Enchytraeidae gen. sp. juv. (mainly <i>Enchytraeus</i> )        | 8                     | 18, 29, 32, 44, 55, 56, 68, 77, 82                                                                     |
| <i>Marionina argentea</i> (Michaelsen, 1889)                    | 1                     | 3                                                                                                      |
| <i>Rhynchelmis</i> sp. juv.                                     | 1                     | 57                                                                                                     |
| <b><i>Trichodrilus cernosvitovi</i> Hrabě, 1938</b>             | 1                     | 28                                                                                                     |
| <b><i>Trichodrilus</i> spp. juv.</b>                            | 11                    | 12, 28, 29, 55                                                                                         |
| Oligochaeta gen. spp. juv.                                      | 2                     | 18, 35                                                                                                 |
| <b>Crustacea Ostracoda</b>                                      |                       |                                                                                                        |
| <i>Pseudocandona</i> sp. juv.                                   | 61                    | 19, 48                                                                                                 |
| <b><i>Typhlocypris</i> cf. <i>eremita</i> (Vejdovský, 1882)</b> | 5                     | 48                                                                                                     |
| Candonidae gen. sp. juv.                                        | 1                     | 18                                                                                                     |
| <b>Crustacea Copepoda</b>                                       |                       |                                                                                                        |
| <i>Acanthocyclops robustus</i> (Sars, 1863) *                   | 6                     | 84                                                                                                     |
| <i>Acanthocyclops venustus</i> (Norman & Scott, 1906) *         | 9                     | 69, 84, 85                                                                                             |
| <i>Acanthocyclops vernalis</i> (Fischer, 1853) *                | 108                   | 84                                                                                                     |
| <i>Diacyclops crassicaudis</i> (Sars, 1863) *                   | 3                     | 83                                                                                                     |
| <b><i>Diacyclops languidoides</i> (Lilljeborg, 1901) *</b>      | 4                     | 84a                                                                                                    |
| <i>Paracyclops imminutus</i> Kiefer, 1929 *                     | 14                    | 86, 91                                                                                                 |
| Cyclopoida <b>copepodites</b> *                                 | 9                     | 69, 82, 84, 85, 86, 88, 91                                                                             |
| Cyclopoida nauplii *                                            | 4                     | 84, 91                                                                                                 |
| Copepoda not identified to species                              | ca. 500               | 2, 3, 6, 9, 12, 21, 23, 25, 26, 27, 29, 31, 32, 35, 37, 40, 48, 49, 50, 52, 56, 57, 58, 59, 60, 61, 62 |
| <b>Crustacea Bathynellacea</b>                                  |                       |                                                                                                        |
| <b><i>Bathynella natans</i> Vejdovský, 1882</b>                 | 38                    | 64, 73, 75                                                                                             |
| <b>Crustacea Amphipoda</b>                                      |                       |                                                                                                        |
| <b><i>Niphargus</i> cf. <i>tatrensis</i> Wrześniowski, 1888</b> | 7                     | 48, 50                                                                                                 |

622

623



624 **Table 2.** Estimated total number of species predicted by four extrapolation estimators based  
625 on abundance data for 19 crustacean and annelid species from 182 samples collected in 91  
626 urban wells in Kraków. SD = standard deviation.

627

| Estimator        | Expected species richness |
|------------------|---------------------------|
| Chao 1 $\pm$ SD  | 31.5 $\pm$ 17.1           |
| Jackknife 1      | 28.9                      |
| Bootstrap        | 23.2                      |
| Michaelis-Menten | 31.4                      |

628

629

630

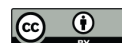

**Table 3.** Diversity measures for crustaceans and annelids found in the 28 out of 91 studied urban wells in Kraków, shown for the full dataset and separately for **stygobiontic** and non-**stygobiontic** species subsets. Gamma diversity = total species richness, Beta diversity = global Whittaker species turnover index, Alpha diversity = average species richness per well, Species frequency = number of wells in which species occurred. SD = standard deviation, BCa = bias-corrected and accelerated bootstrap method. Differences in mean alpha diversity and species frequency between stygobiontic and non-stygobiontic datasets were tested using one-way permutational analysis of variance PERMANOVA: F = permutation-based test statistic, P = probability based on 9,999 permutations. Statistically significant value is bolded.

|                     | Full species dataset | Stygobiontic species subset | Non-stygobiontic species subset | Statistical difference        |
|---------------------|----------------------|-----------------------------|---------------------------------|-------------------------------|
| Gamma diversity     | 19                   | 6                           | 13                              |                               |
| Beta diversity      | 12.3                 | 13.0                        | 12.0                            |                               |
| Alpha diversity     |                      |                             |                                 |                               |
| Range               | 1–3                  | 0–2                         | 0–3                             |                               |
| Mean                | 1.43                 | 0.43                        | 1.00                            | F = 4.874<br><b>P = 0.026</b> |
| SD                  | 0.69                 | 0.69                        | 0.67                            |                               |
| BCa 95% Lower limit | 1.18                 | 0.14                        | 0.71                            |                               |
| BCa 95% Upper limit | 1.64                 | 0.64                        | 1.21                            |                               |
| Species frequency   |                      |                             |                                 |                               |
| Range               | 1–10                 | 1–4                         | 1–10                            |                               |
| Mean                | 2.11                 | 2.00                        | 2.15                            | F = 0.020<br>P = 0.953        |
| SD                  | 2.13                 | 1.26                        | 2.48                            |                               |
| BCa 95% Lower limit | 1.26                 | 1.00                        | 1.08                            |                               |
| BCa 95% Upper limit | 3.05                 | 2.83                        | 3.38                            |                               |



**Table 4.** Pearson correlation coefficients between the first two axes of Principal Coordinate Analysis (PCoA) and relative abundance of eight crustacean and annelid species showing correlation values > 0.2 with at least one axis. Stygobiontic species are shown in bold.

| Species                                 | PCoA1  | PCoA2  |
|-----------------------------------------|--------|--------|
| <i>Enchytraeus</i> spp.                 | 0.979  | 0.061  |
| <b><i>Trichodrilus</i> sp. juv.</b>     | -0.130 | -0.903 |
| <b><i>Bathynella natans</i></b>         | -0.303 | 0.419  |
| <b><i>Trichodrilus cernosvitovi</i></b> | -0.130 | -0.412 |
| <i>Aeolosoma</i> spp.                   | -0.090 | 0.339  |
| <i>Acanthocyclops venustus</i>          | -0.210 | 0.085  |
| <i>Paracyclops imminutus</i>            | -0.203 | 0.080  |
| Candonidae juv.                         | 0.247  | 0.021  |



651 **Captions of Figures**

652

653 **Fig. 1.** Map of the study area showing the locations of urban wells sampled within the  
654 Kraków metropolitan area for the study of annelids and crustaceans (modified from  
655 Dumnicka et al. 2025). Wells where stygobionts were detected are marked as follows: B =  
656 *Bathynella natans*, D = *Diacyclops languidoides*, N = *Niphargus* cf. *tatrensis*, T =  
657 *Typhlocypris* cf. *eremita*, Tr = *Trichodrilus* spp. juv. + *T. cernosvitovi*.

658

659 **Fig. 2.** Photographs of representative surveyed wells: left – bored/dug well with piston pump;  
660 right – artesian deep well with tap.

661

662 **Fig. 3.** Boxplots summarizing the chemical and physical characteristics of groundwater in the  
663 studied urban wells in Kraków, Poland. Boxes represent the mean  $\pm$  standard deviation, with  
664 whiskers indicating full range (minimum to maximum) of values.

665

666 **Fig. 4.** Mean cumulative species richness of the 19 studied invertebrate species (including  
667 stygobiontic and non-stygobiontic annelids, ostracods, copepods, bathynellaceans, and  
668 amphipods) plotted against the number of 182 samples from 91 urban wells in Kraków.  
669 Whiskers represent  $\pm 1$  standard deviation.

670

671 **Fig. 5.** Non-metric Multidimensional Scaling (nMDS) ordination plot showing no significant  
672 differences in annelid and crustacean community structure between groundwater samples  
673 collected in spring (light green circles) and autumn (brown diamonds) from the studied urban  
674 wells in Kraków, Poland.

675

676 **Fig. 6.** Principal Coordinate Analysis (PCoA) of annelid and crustacean community  
677 composition in groundwater from the studied urban wells in Kraków, Poland. Points represent  
678 individual wells (well numbers correspond to Table 1 and Supplementary Table 1). Pearson  
679 correlation vectors with values  $> 0.2$  on at least one axis are overlaid.

680

681

682



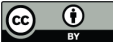

683

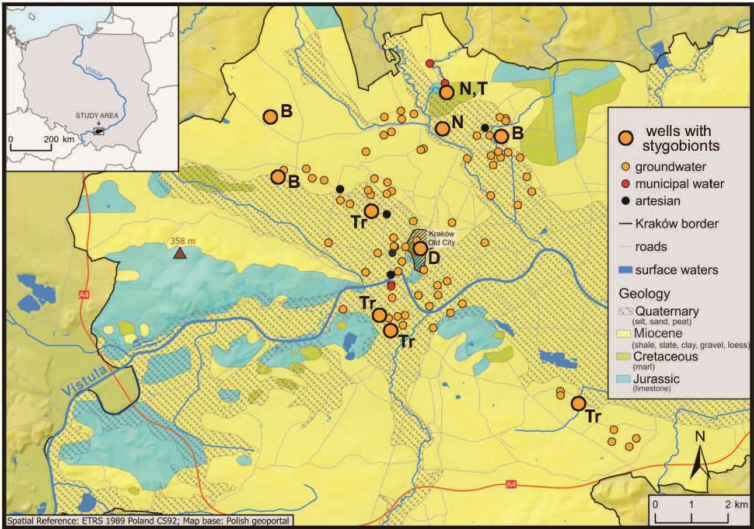

684

685

686

687

688

689

690

691

692

693

**Fig. 1.** Map of the study area showing the locations of urban wells sampled within the Kraków metropolitan area for the study of annelids and crustaceans (modified from Dumnicka et al. 2025). Wells where stygobionts were detected are marked as follows: B = *Bathynella natans*, D = *Diacyclops languidoides*, N = *Niphargus cf. tatrensis*, T = *Typhlocypris cf. eremita*, Tr = *Trichodrilus* spp. juv. + *T. cernosvitovi*.



694

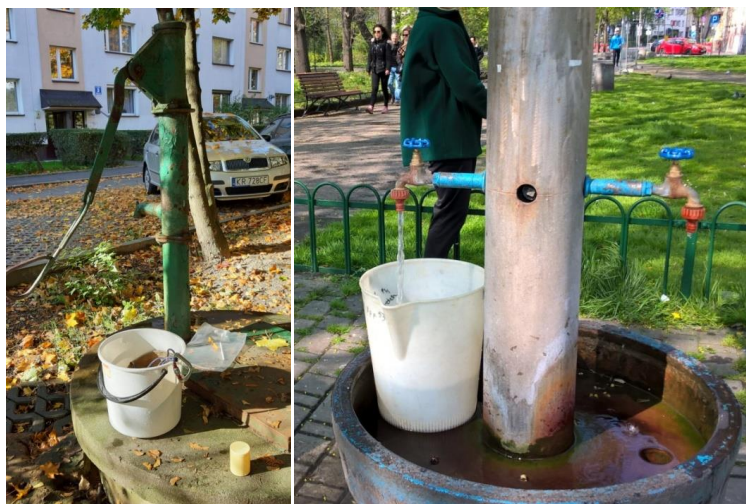

695

696

697

698

699

700

701

**Fig. 2.** Photographs of representative surveyed wells: left – bored/dug well with piston pump; right – artesian deep well with tap.



702  
703  
704

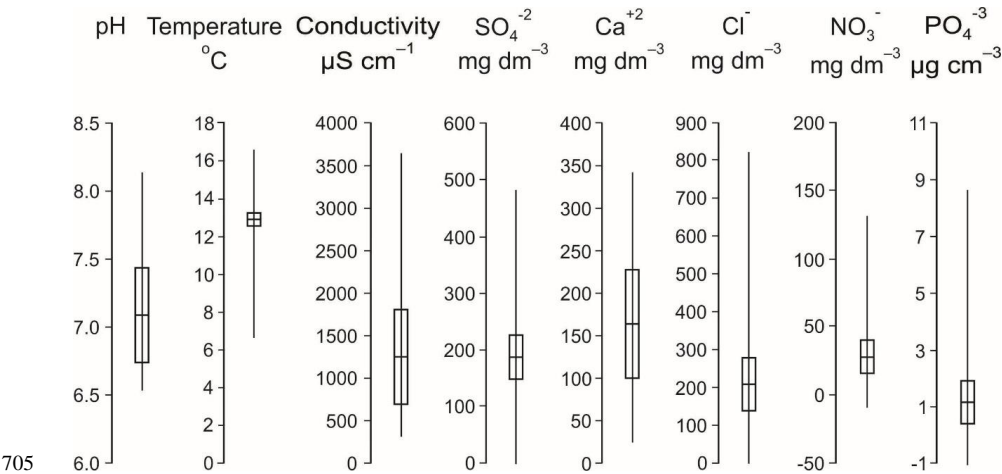

705  
706  
707  
708  
709  
710  
711  
712  
713  
714

**Fig. 3.** Boxplots summarizing the chemical and physical characteristics of groundwater in the studied urban wells in Kraków, Poland. Boxes represent the mean  $\pm$  standard deviation, with whiskers indicating full range (minimum to maximum) of values.



715

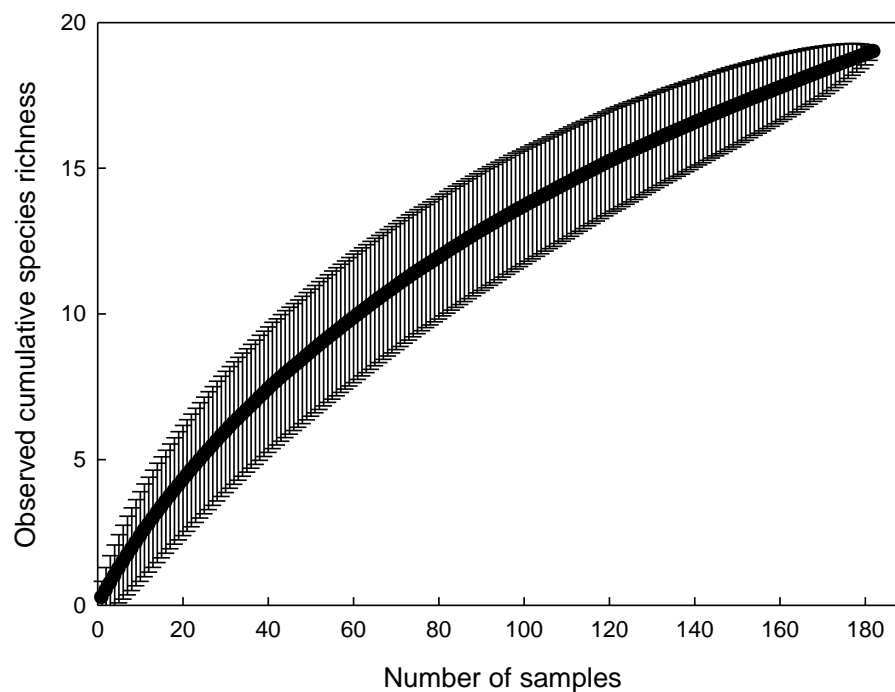

716

717

718 **Fig. 4.** Mean cumulative species richness of the 19 studied invertebrate species (including  
719 stygobiontic and non-stygobiontic annelids, ostracods, copepods, bathynellaceans, and  
720 amphipods) plotted against the number of 182 samples from 91 urban wells in Kraków.  
721 Whiskers represent  $\pm 1$  standard deviation.

722

723

724

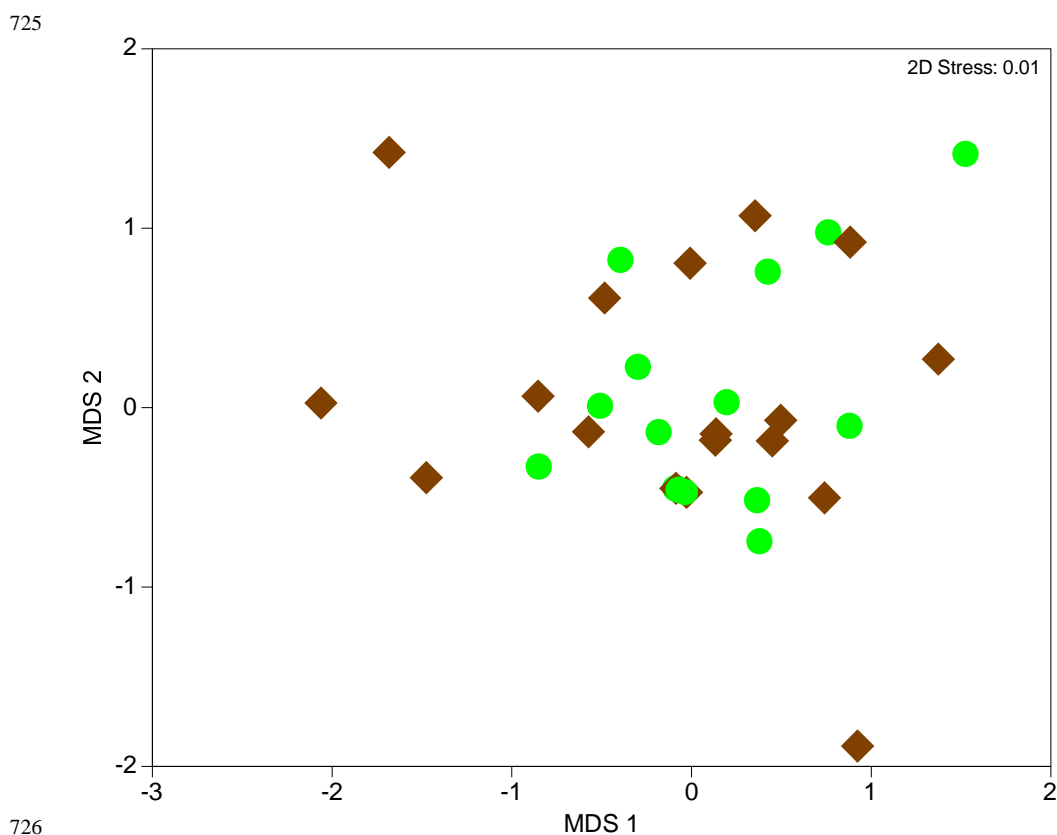

**Fig. 5.** Non-metric Multidimensional Scaling (nMDS) ordination plot showing no significant differences in annelid and crustacean community structure between groundwater samples collected in spring (light green circles) and autumn (brown diamonds) from the studied urban wells in Kraków, Poland.

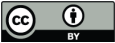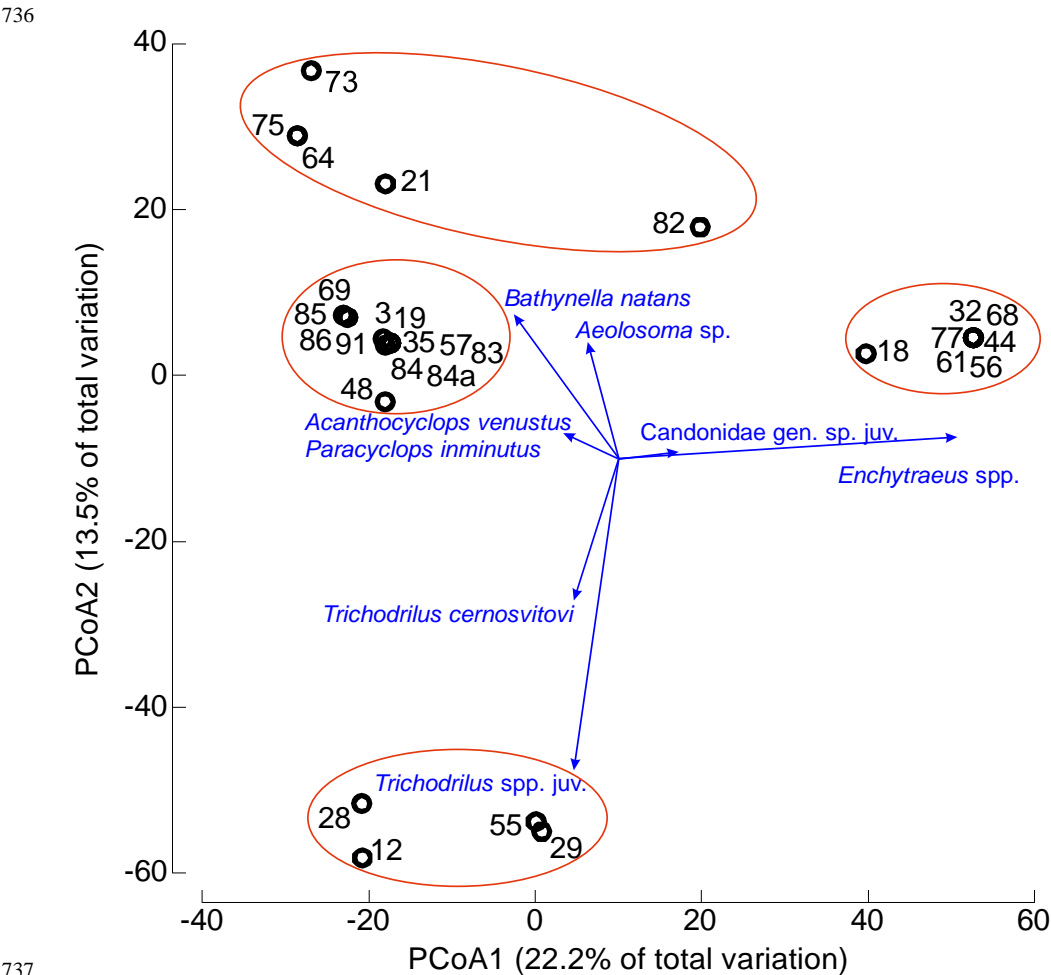

**Fig. 6.** Principal Coordinate Analysis (PCoA) of annelid and crustacean community composition in groundwater from the studied urban wells in Kraków, Poland. Points represent individual wells (well numbers correspond to Table 1 and Supplementary Table 1). Pearson correlation vectors with values > 0.2 on at least one axis are overlaid.
